# Supplementary material
Source: PubMed Central journal article supplement (PMC4400535)
Supplement: supp_eru272_jexbot123422_file001.pdf [file supp_eru272_jexbot123422_file001.pdf]

## HomoGalacturonan-Modifying Enzymes (HGMEs): structure, expression and roles in plants

Fabien Sénéchal, Christopher Wattier, Christine Rustérucci, and Jerome Pelloux

### SUPPLEMENTARY DATA

#### Supplementary Table S1. Comparative inventory of the structural motifs of PME, PAE, PG and PLL isoforms between dicot and monocot species.

Detection of putative signal peptides (SP) and/or transmembrane domains (TM) by *in silico* analysis was performed using SignalP4.0 (<http://www.cbs.dtu.dk/services/SignalP/>) and TargetP1.1 (<http://www.cbs.dtu.dk/services/TargetP/>) programs. A lack of targeting motifs characterizes predicted soluble proteins (SOL).

| Plant species                        | Nb isoforms | Structural motifs |         |          |          |
|--------------------------------------|-------------|-------------------|---------|----------|----------|
|                                      |             | SP                | SP+TM   | TM       | SOL      |
| <b>PME</b>                           |             |                   |         |          |          |
| <i>Arabidopsis thaliana</i> (Dicots) | 66 (100%)   | 35 (53%)          | 2 (3%)  | 25 (38%) | 4 (6%)   |
| <i>Oryza sativa</i> (Monocots)       | 41 (100%)   | 19 (46%)          | 3 (7%)  | 15 (37%) | 4(10%)   |
| <b>PAE</b>                           |             |                   |         |          |          |
| <i>Arabidopsis thaliana</i> (Dicots) | 12 (100%)   | 7 (58%)           | 2 (17%) | 3 (25%)  | 0 (0%)   |
| <i>Oryza sativa</i> (Monocots)       | 10 (100%)   | 6 (60%)           | 1 (10%) | 2 (20%)  | 1 (10%)  |
| <b>PG</b>                            |             |                   |         |          |          |
| <i>Arabidopsis thaliana</i> (Dicots) | 68 (100%)   | 50 (74%)          | 1 (1%)  | 11 (16%) | 6 (9%)   |
| <i>Oryza sativa</i> (Monocots)       | 45 (100%)   | 31 (69%)          | 0 (0%)  | 5 (11%)  | 9 (20%)  |
| <b>PLL</b>                           |             |                   |         |          |          |
| <i>Arabidopsis thaliana</i> (Dicots) | 26 (100%)   | 20 (77%)          | 1 (4%)  | 2 (7%)   | 3 (12%)  |
| <i>Oryza sativa</i> (Monocots)       | 12 (100%)   | 6 (50%)           | 0 (0%)  | 2 (17%)  | 4 (33%)  |
| <b>All HGMEs</b>                     |             |                   |         |          |          |
| <i>Arabidopsis thaliana</i> (Dicots) | 172 (100%)  | 112 (65%)         | 6 (3%)  | 41 (24%) | 13 (8%)  |
| <i>Oryza sativa</i> (Monocots)       | 108 (100%)  | 62 (57%)          | 4 (4%)  | 24 (22%) | 18 (17%) |

**Supplementary Table S2. Gene expression variations of HG-modifying enzyme inhibitor proteins (PMEIs, PGIPs) after biotic stresses.** Piercing-sucking insects (yellow box), chewing insects (turquoise), nematodes (blue), bacteria (black), fungi (light gray) and viruses (red). Bolded species names indicate necrotrophic pathogens.

| Gene name                                           | AGI or accession       | Stress         | Species name                              | Induction                                                                                                             | References                     |
|-----------------------------------------------------|------------------------|----------------|-------------------------------------------|-----------------------------------------------------------------------------------------------------------------------|--------------------------------|
| <b>Pectin Methyl Esterase Inhibitors (PMEIs)</b>    |                        |                |                                           |                                                                                                                       |                                |
| <i>AtPMEI</i><br><i>AtPMEI3</i>                     | At2g26440<br>At5g20740 | Aphid          | <i>Brevicoryne brassicae</i>              | 32 aphids/plant<br>upregulated 6, 12, 24, 48 hpi (x1.39, 1.93, 2.19, 1.78)<br>downregulated 6, 48 hpi (x-1.62, -2.08) | Kusnierczyk <i>et al.</i> 2008 |
| <i>AtPMEI</i>                                       | At5g62360              | Aphid          | <i>Myzus persicae</i>                     | 40 aphids/plant; 72 hpi<br>upregulated (x1200 $\mu$ arr, 1800 qRT-PCR)                                                | De Vos <i>et al.</i> 2005      |
| <i>AtPMEI</i><br><i>AtPMEI</i>                      | At4g25260<br>At1g14890 | Whitefly       | <i>Bemisia tabaci</i>                     | 100 whiteflies/plant; 21 dpi<br>upregulated (x-1.96)<br>upregulated (x-2.40)                                          | Kempema <i>et al.</i> 2007     |
| <i>AtPMEI</i>                                       | At1g23205              | Aphid          | <i>Myzus persicae</i> saliva infiltration | 50 aphids/plant; 24 (OS), 48, 72 (OS+feeding) hpi<br>downregulated (x-2.1, -6.5, -5.5)                                | De Vos <i>et al.</i> 2009      |
| <i>AtPMEI</i>                                       | At1g62770              | Aphid          | <i>Brevicoryne brassicae</i>              | 32 aphids/plant, 72 hpi<br>downregulated (x-4.03)                                                                     | Kusnierczyk <i>et al.</i> 2011 |
| <i>AtPMEI</i>                                       | At1g47960              | Chewing insect | <i>Spodoptera littoralis</i> OS           | 1mm holes punctured and 1 uL of insect OS applied; 6, 24 hpi<br>upregulated (x 6.54, 2.75)                            | Consales <i>et al.</i> 2011    |
| <i>AtPMEI</i>                                       | At5g62340              | Nematode       | <i>Meloidogyne javanica</i>               | 10-12 J2 nematodes/root tip; 3 dpi<br>downregulated (x-4.59)                                                          | Barcala <i>et al.</i> 2010     |
| <i>Capsicum annuum</i> (Pepper)<br><i>CaPMEI</i>    |                        | Bacterium      | <i>Xanthomonas campestris</i>             | 108 cfu/mL;<br>upregulated (at 1, 2, 4, 6, 12, 18 hpi qRT-PCR)                                                        | An <i>et al.</i> 2008          |
| <i>Solanum tuberosum</i> (Potato)<br><i>StPMEI</i>  | STMER56<br>(At1g23205) | Virus          | PVY <sup>N</sup> and PVY <sup>NTN</sup>   | 0.5 hpi<br>downregulated (x-1.44 $\mu$ arr, -1.64 qRT-PCR)                                                            | Kogovsek <i>et al.</i> 2010    |
| <b>Polygalacturonase Inhibitor Proteins (PGIPs)</b> |                        |                |                                           |                                                                                                                       |                                |
| <i>AtPGIP</i>                                       | At5g49215              | Aphid          | <i>Brevicoryne brassicae</i>              | 32 aphids/plant, 6, 12, 24, 48 hpi<br>downregulated (x-1.21, -1.46, -1.38, -1.52)                                     | Kusnierczyk <i>et al.</i> 2008 |
|                                                     |                        | Chewing insect | <i>Spodoptera littoralis</i> OS           | 1mm holes punctured and 1 uL of insect OS applied; 6, 24 hpi                                                          | Consales <i>et al.</i> 2011    |

|                                  |           |                |                                |                                                        |                                      |
|----------------------------------|-----------|----------------|--------------------------------|--------------------------------------------------------|--------------------------------------|
| <i>AtPGIP</i>                    | At3g12145 |                |                                | upregulated (x6.28, 3.73)                              |                                      |
|                                  |           | Chewing insect | <i>Spodotera littoralis</i>    | 32 newly hatched larvae on 22 plants, 7-8 dai          | Bodenhaussen & Reymond 2007          |
| <i>AtPGIP1</i>                   | At5g06860 |                |                                | upregulated (x5.17)                                    |                                      |
|                                  |           | Chewing insect | <i>Pieris rapae</i>            | upregulated (x9.38)                                    | Bodenhaussen & Reymond 2007          |
| <i>AtPGIP1</i>                   | At5g06860 |                |                                | 1 newly hatched larva/plant, 7-8 dai                   |                                      |
| <i>Phaseolus vulgaris</i> (Bean) |           | Fungus         | <i>Rhizoctonia solani</i>      | 8, 16 hpi                                              | Guerrero-Gonzalez <i>et al.</i> 2011 |
| <i>PvPGIP</i>                    | At5g49215 |                |                                | upregulated (x2.5, 2.7)                                |                                      |
| <i>Pisum sativum</i> (Pea)       |           | Nematode       | <i>Heterodera goettingiana</i> | 150 J2 nematodes on 10 days-old seedling; 24 or 48 hpi | Veronico <i>et al.</i> 2011          |
| <i>Pspgip1</i>                   |           |                |                                | upregulated (x7.00, x2.75)                             |                                      |
